# Supplementary material for: Biophysical characterization of calcium-binding and modulatory-domain dynamics in a pentameric ligand-gated ion channel
Source: PubMed Central journal article supplement (PMC9897478; doi:10.1073/pnas.2210669119), 2022-12-08
Supplement: pnas.2210669119.sapp.pdf [file pnas.2210669119.sapp.pdf]

1

## 2 **Supporting Information for**

### 3 **Biophysical characterization of calcium-binding and modulatory-domain dynamics in a** 4 **pentameric ligand-gated ion channel**

5 **Marie Lycksell, Urška Rovšnik, Anton Hanke, Anne Martel, Rebecca J Howard, and Erik Lindahl**

6 **Corresponding Erik Lindahl.**

7 **E-mail: [erik.lindahl@scilifelab.se](mailto:erik.lindahl@scilifelab.se)**

#### 8 **This PDF file includes:**

- 9 Figs. S1 to S19
- 10 Tables S1 to S7
- 11 Legend for Movie S1
- 12 SI References

#### 13 **Other supporting materials for this manuscript include the following:**

- 14 Movie S1

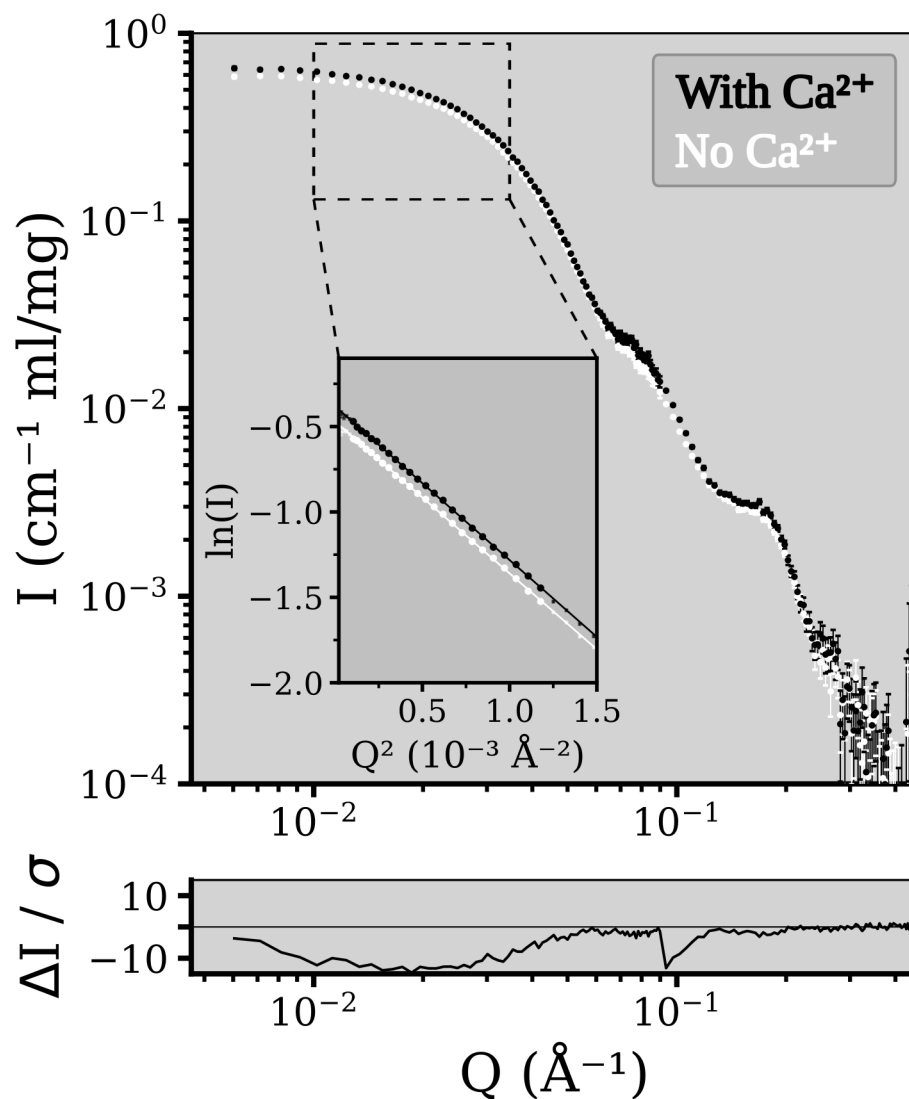

**Fig. S1. Comparison of small angle neutron scattering from DeCLIC in the presence and absence of calcium.** Small angle neutron scattering profiles from DeCLIC in the presence (black) and absence (white) of calcium, with the insert showing the Guinier plot of the low Q region together with the Guinier fits as lines. The lower panel shows the error weighted residual between the conditions.

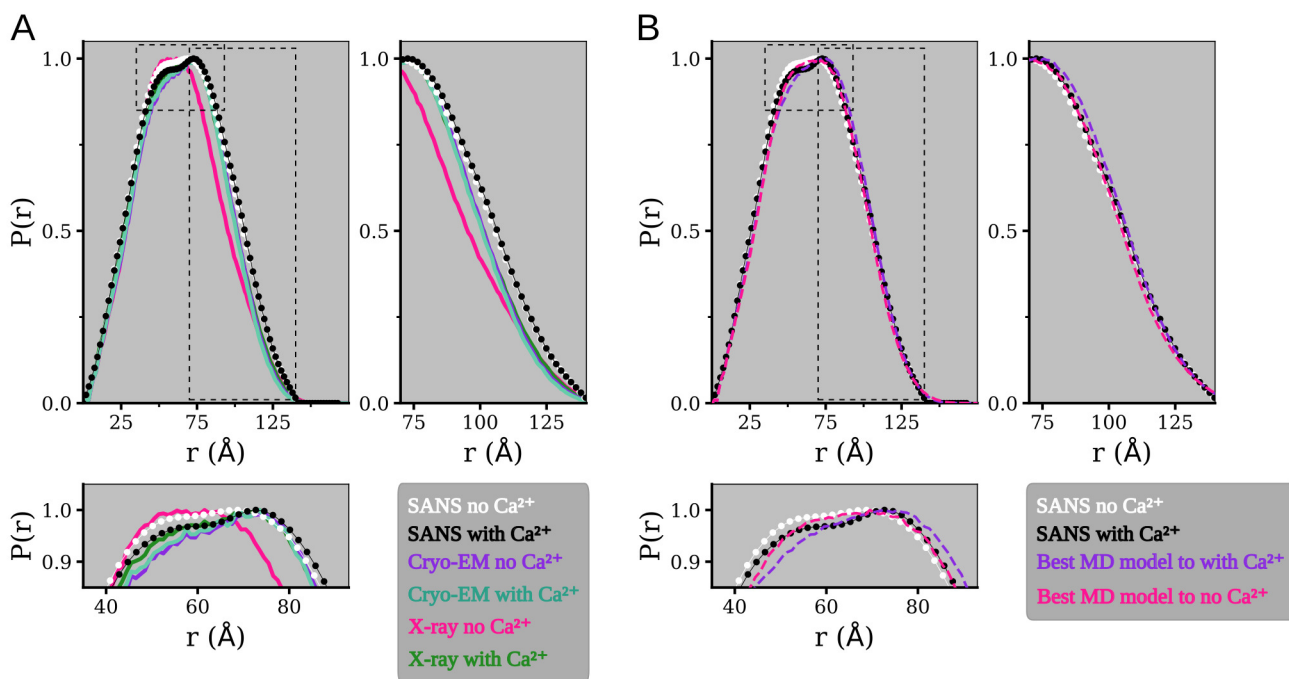

**Fig. S2. Pairwise distance distributions from SANS compared to that of structures and models.** (A) Pairwise distance distribution from SANS data with (black) and without (white) calcium, and for structures from cryo-EM and X-ray crystallography determined in the presence (aquamarine for cryo-EM, green for X-ray) and absence of calcium (purple for cryo-EM, pink for X-ray). The lower box shows a zoom on the peak of the distributions, the box to the right shows a zoom on the larger distances. The peak show that SANS in the absence of calcium yields a distribution with features similar to both the X-ray no  $\text{Ca}^{2+}$  structure and to the closed-like structures, while the SANS data with  $\text{Ca}^{2+}$  is closest to the X-ray with calcium structure. The long distances show that the structures in this region underestimate the values observed with SANS. (B) Pairwise distance distribution from SANS data with (black) and without (white) calcium, and for the models from molecular which gives the best fit to the SANS data. The purple model gives the best fit to the with  $\text{Ca}^{2+}$  SANS data and comes from the simulations of the calcium free cryo-EM structure. The pink model gives the best fit to the no  $\text{Ca}^{2+}$  SANS data and comes from the simulations of the calcium free X-ray structure. The lower box shows a zoom on the peak of the distributions, the box to the right shows a zoom on the larger distances. It can be seen in the peak region that these models are not perfect matches for the distance distributions obtained from SANS, while the larger distances show that the agreement between the models and the SANS data has improved in this region.

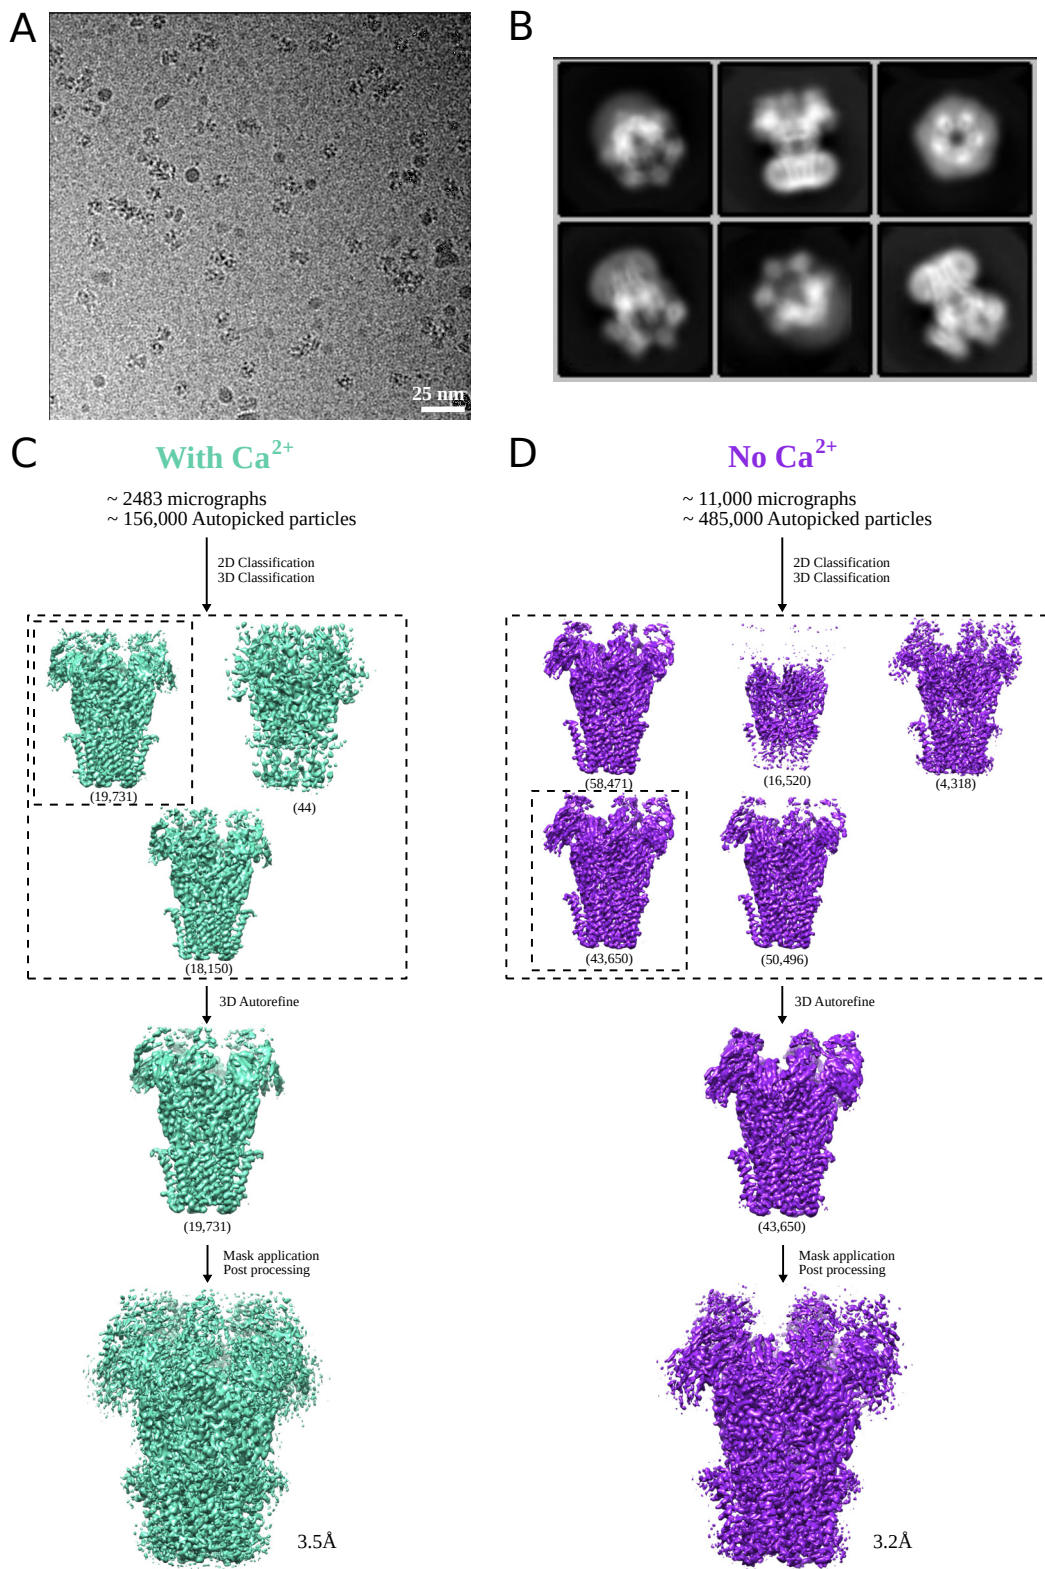

**Fig. S3. Cryo-EM data and processing.** (A) Representative micrograph from one of the grids used for data collection on a Titan Krios, showing detergent-solubilized DeCLIC particles. (B) Representative 2D class averages at 0.82 Å/px in a 256 x 256 pixel box and a 200 Å mask. (C) Overview of the cryo-EM processing pipeline for data collected at pH 7 with  $\text{Ca}^{2+}$ . (D) Same as in C but for a dataset where no  $\text{Ca}^{2+}$  was present (see Methods).

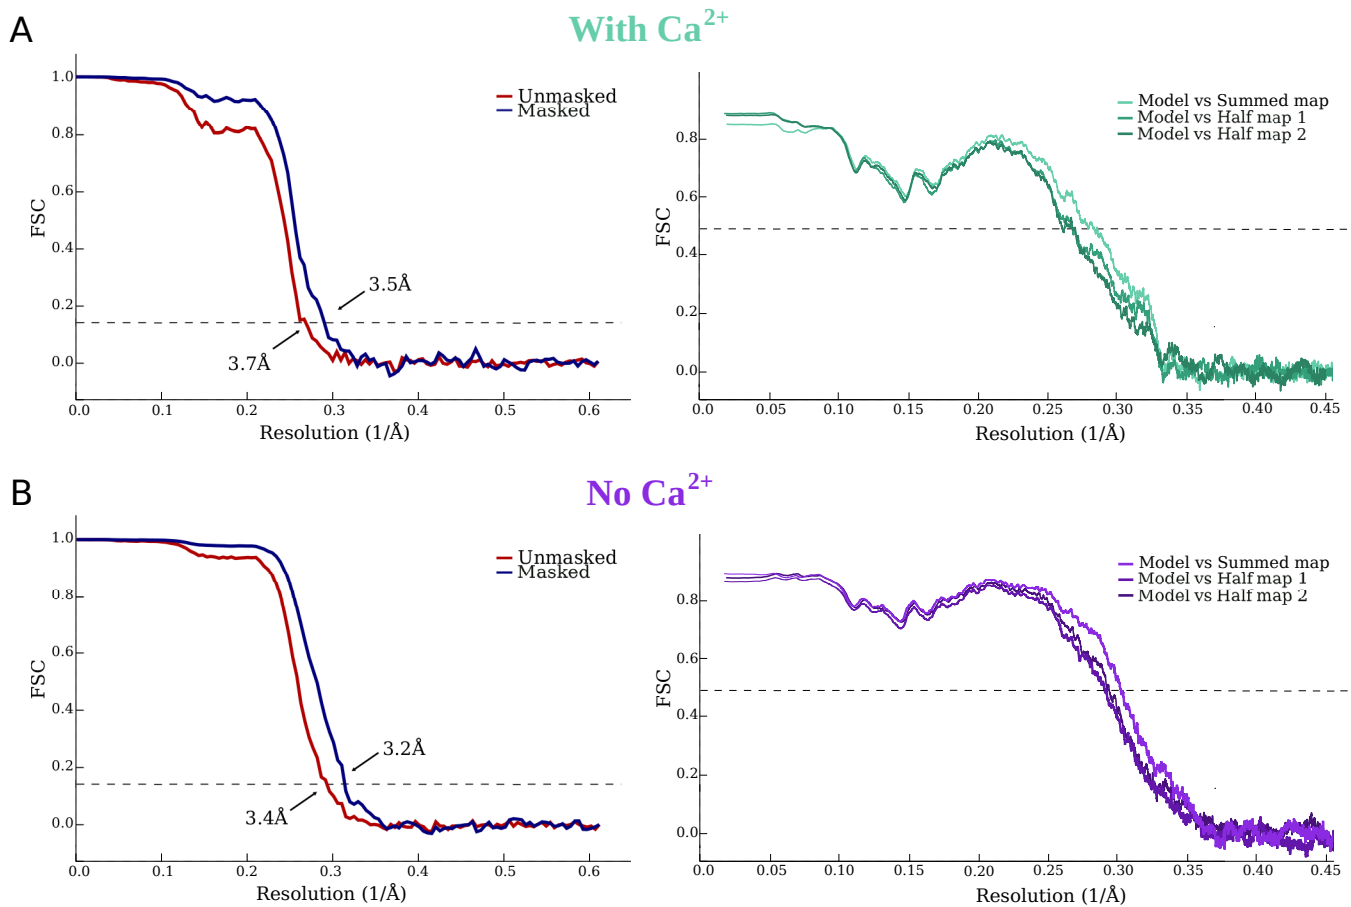

**Fig. S4. Fourier Shell Correlation.** (A) *Left*: FSC curves for cryo-EM reconstructions at pH 7 with Ca<sup>2+</sup> before (red) and after (blue) applying a soft mask. *Right*: FSC curves for cross-validation between model and half-map 1 (medium), model and half-map 2 (dark) and model and summed map (light). (B) FSC curves represented as in panel A for the dataset at pH 7 without Ca<sup>2+</sup>.

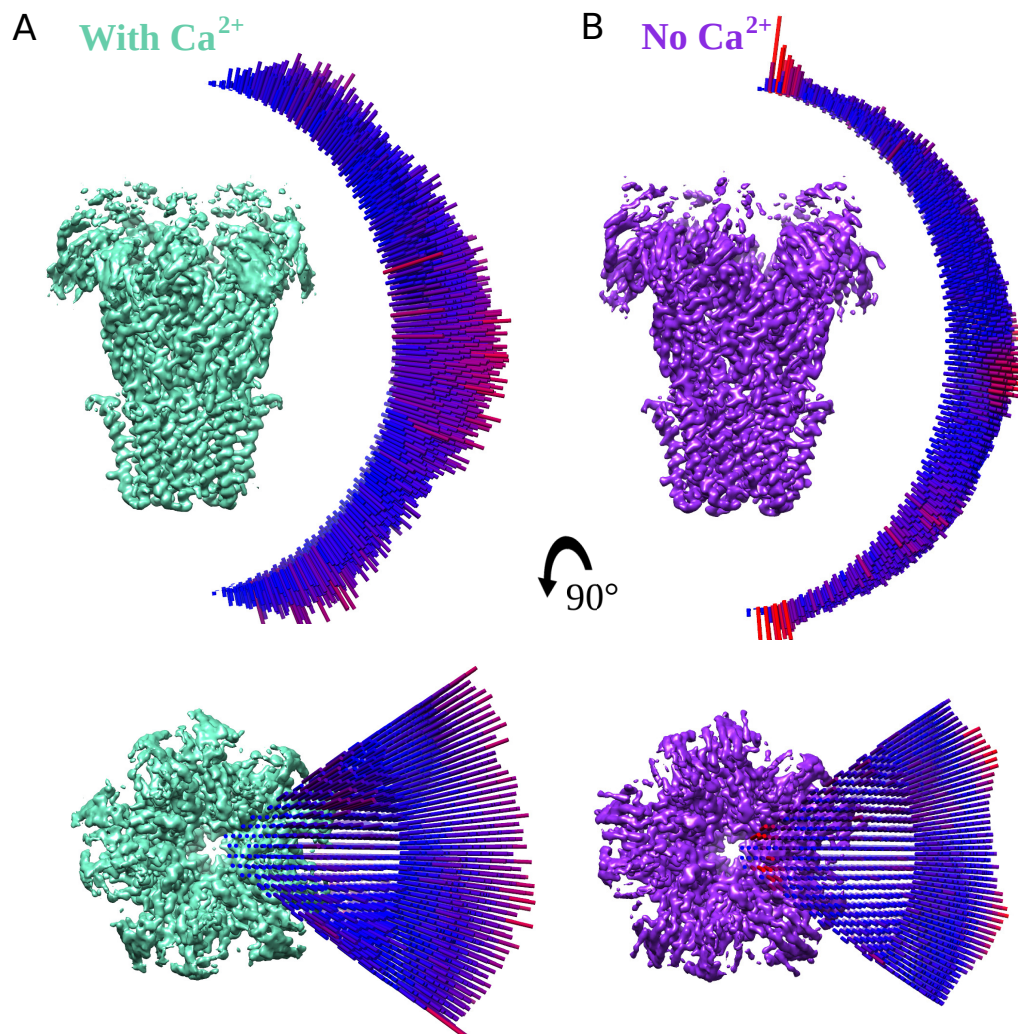

**Fig. S5. Distribution of orientation sampling in the cryo-EM maps.** (A) *Top:* Side view of the cryo-EM map for DeCLIC at pH 7 with  $\text{Ca}^{2+}$  and the distribution of orientation sampling after refinement. The height and the color (blue to red) of the bar represent the abundance of that particular view. *Bottom:* Representation of the same map from the top. (B) Map and distributions as in panel A for the dataset at pH 7 with no  $\text{Ca}^{2+}$ .

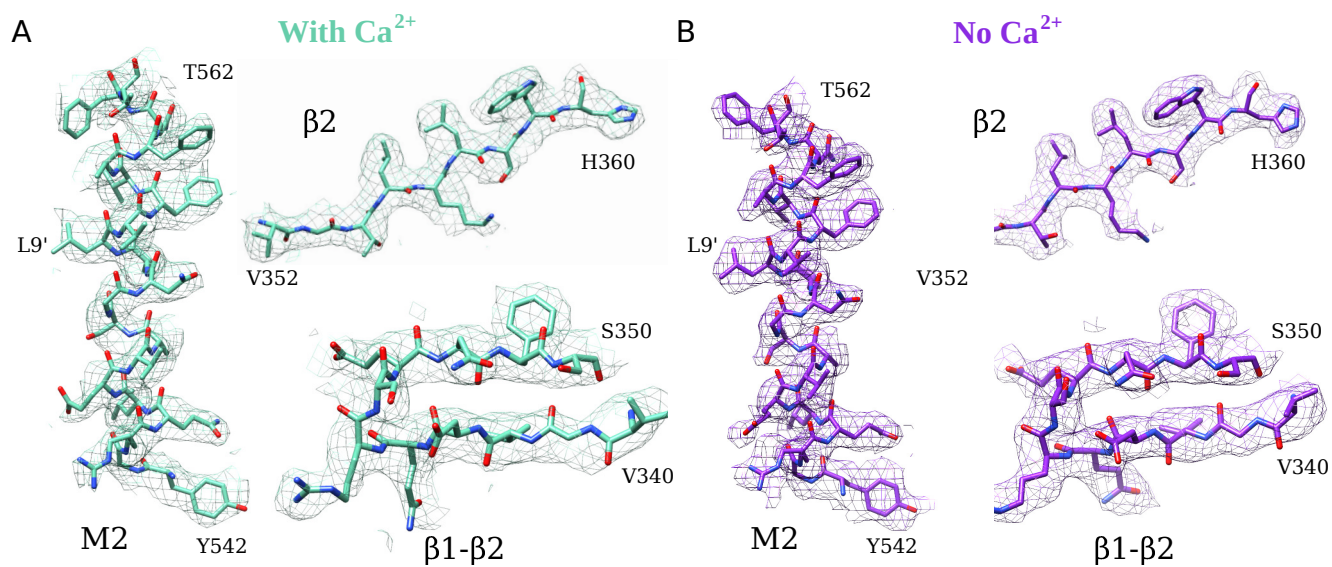

**Fig. S6. Cryo-EM map and atomic model for select regions of DeCLIC.** (A) Density (mesh) and corresponding atomic model (sticks, colored by heteroatom) for the M2 helix (Y542–T562), part of the β2 strand (V352–H360) and a β1-β2 loop (V340–S350) for the pH 7 with Ca<sup>2+</sup> model. (B) Density and corresponding model, shown as in panel A, for the pH 7 model without Ca<sup>2+</sup>.

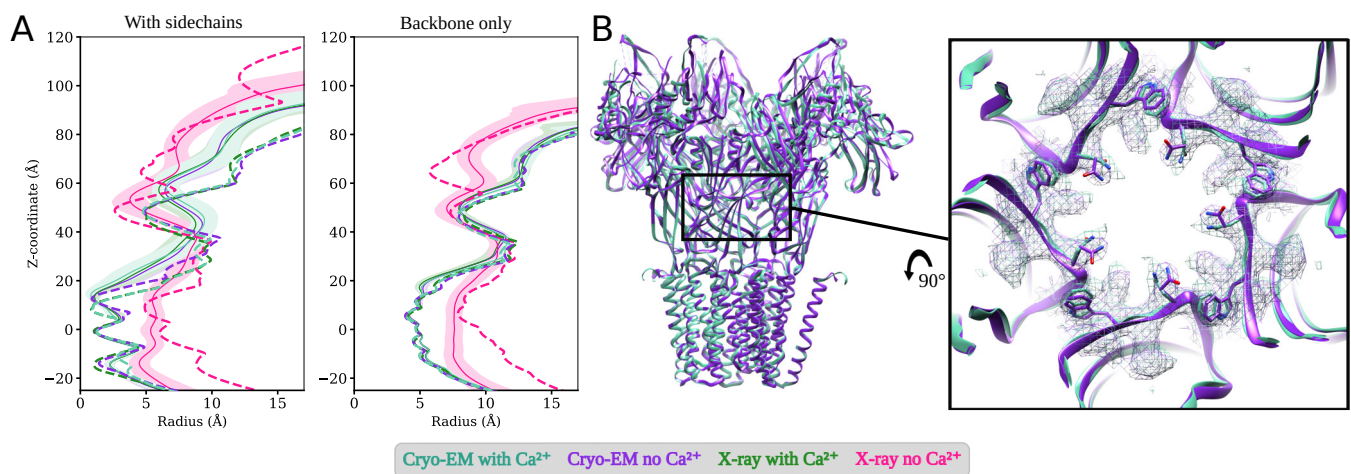

**Fig. S7. Pore profiles of DeCLIC and zoom in view of the constriction point in the ECD.** Pore profiles were calculated including sidechains (left) and only backbone atoms (right) respectively. Dashed lines show the profile for the starting structures and solid lines represent the simulation average with standard deviation in colored fill. The pore profiles for simulations of the with calcium X-ray structure and both cryo-EM structures overlap, and are in close agreement. The simulations started from the calcium free X-ray structure show a decrease in pore radius, largely attributable to backbone motion. Zoom in box (right) shows the most constricted region in the ECD with Trp407 and Asn405 being the two constricting residues.



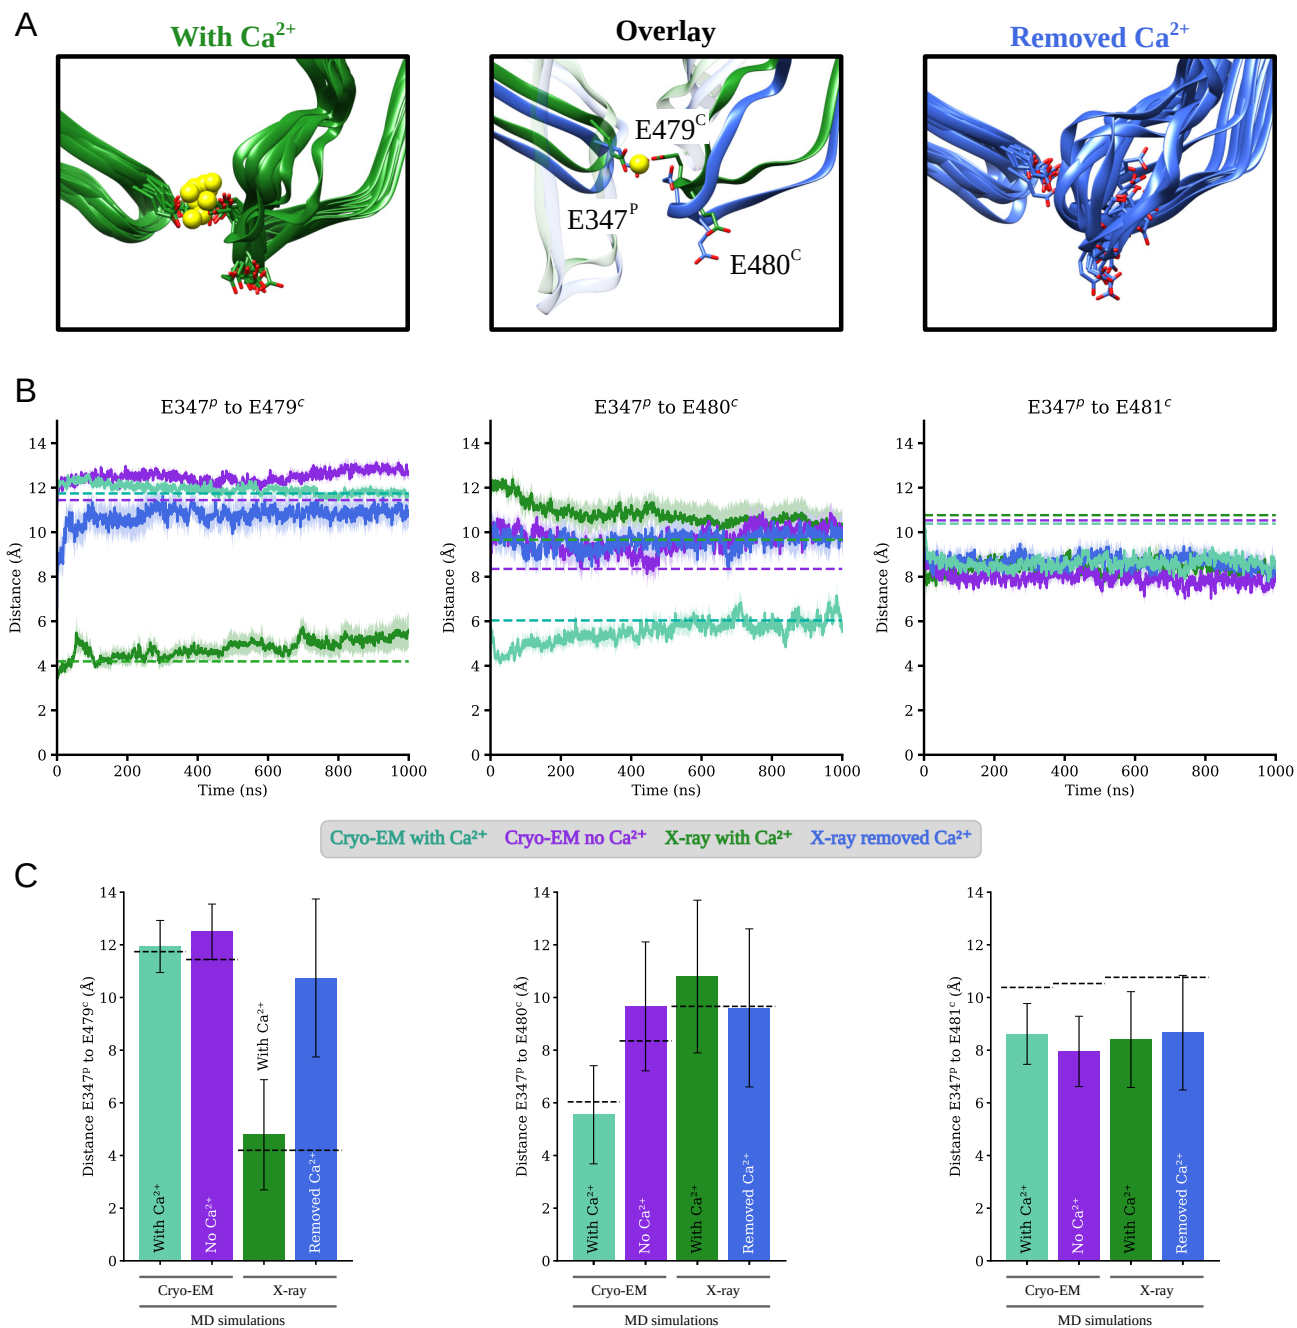

**Fig. S8. Behaviour of glutamates in the calcium binding site.** (A) Snapshots from simulations starting from the with calcium X-ray structure by Hu et al. (1) (PDB ID: 6V4S); in green simulated with the resolved calcium ion present, and in blue simulated with the calcium ion removed. The center panel shows an overlay the initial simulation frame, the left and right panels show simulation snapshots spaced by 100 ns. (B) Distance between the sidechain carboxyl groups of glutamates in the calcium binding site, tracked through the MD simulations. The average value from the simulations, averaged over all subunit interfaces from four replicas, are shown as solid lines with the standard error of the mean in colorfill. Dashed lines show the values measured in the X-ray and cryo-EM structures. (C) Distance between the sidechain carboxyl groups of glutamates in the calcium binding site, averaged over time, and all subunit interfaces from four replicas. Error bars show standard deviation. Dashed lines show the distance in the cryo-EM or X-ray structure from which the simulation was started.



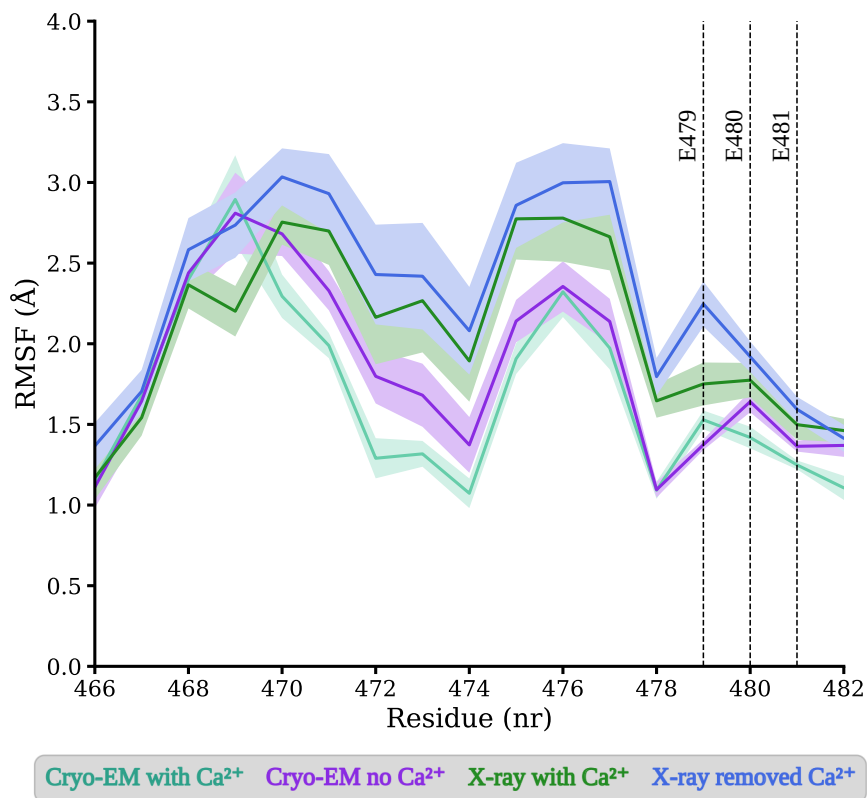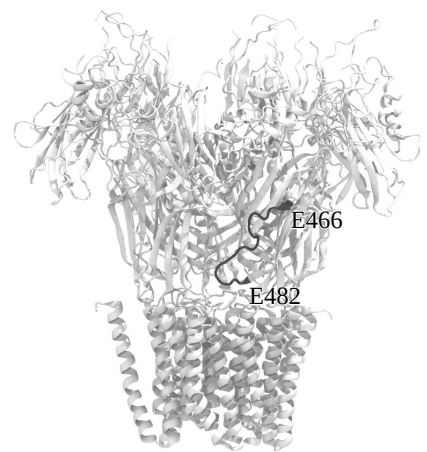

**Fig. S10.** Root mean square fluctuation (RMSF) for residues in loop F (residues shown in black on the structure shown to the right) from simulations starting from cryo-EM structures of DeCLIC in the presence (aquamarine) and absence (purple) of calcium, and from the X-ray structure with calcium - which was simulated with Ca<sup>2+</sup> (green) and with Ca<sup>2+</sup> removed (blue). Solid lines represent the average over all subunits in four replicas, and the standard error of the mean is shown as colorfill. Dashed vertical lines indicate the three consecutive glutamates E479, E480, and E481, which are located in the calcium binding site.

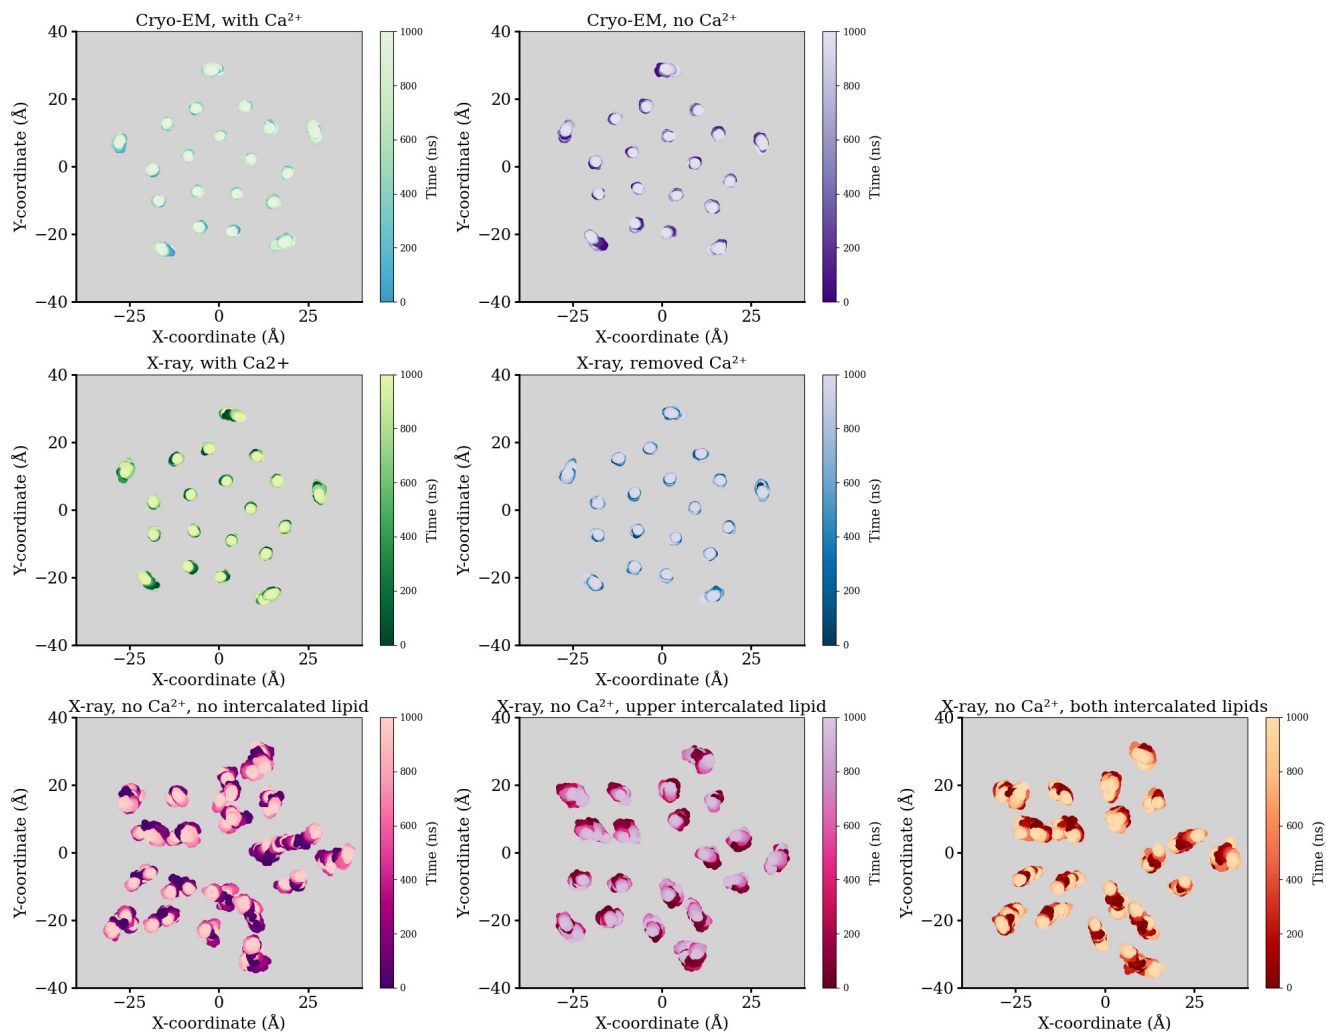

**Fig. S11. Center of mass position for the transmembrane helices through molecular dynamics simulations**, four replicas, of the cryo-EM structures with and without  $\text{Ca}^{2+}$ , the X-ray structure with  $\text{Ca}^{2+}$  (simulated with  $\text{Ca}^{2+}$  and with  $\text{Ca}^{2+}$  removed), and the X-ray structure without  $\text{Ca}^{2+}$  (simulated without intercalated lipid, with intercalated upper leaflet lipid, and with both upper and lower leaflet lipids intercalated). Simulations started from the cryo-EM structures and the with  $\text{Ca}^{2+}$  X-ray structure have stable helix positions through the simulations, with the most mobility for the lipid facing M4 helix. Simulations started from the no  $\text{Ca}^{2+}$  X-ray structure display less stable positions of the transmembrane helices.

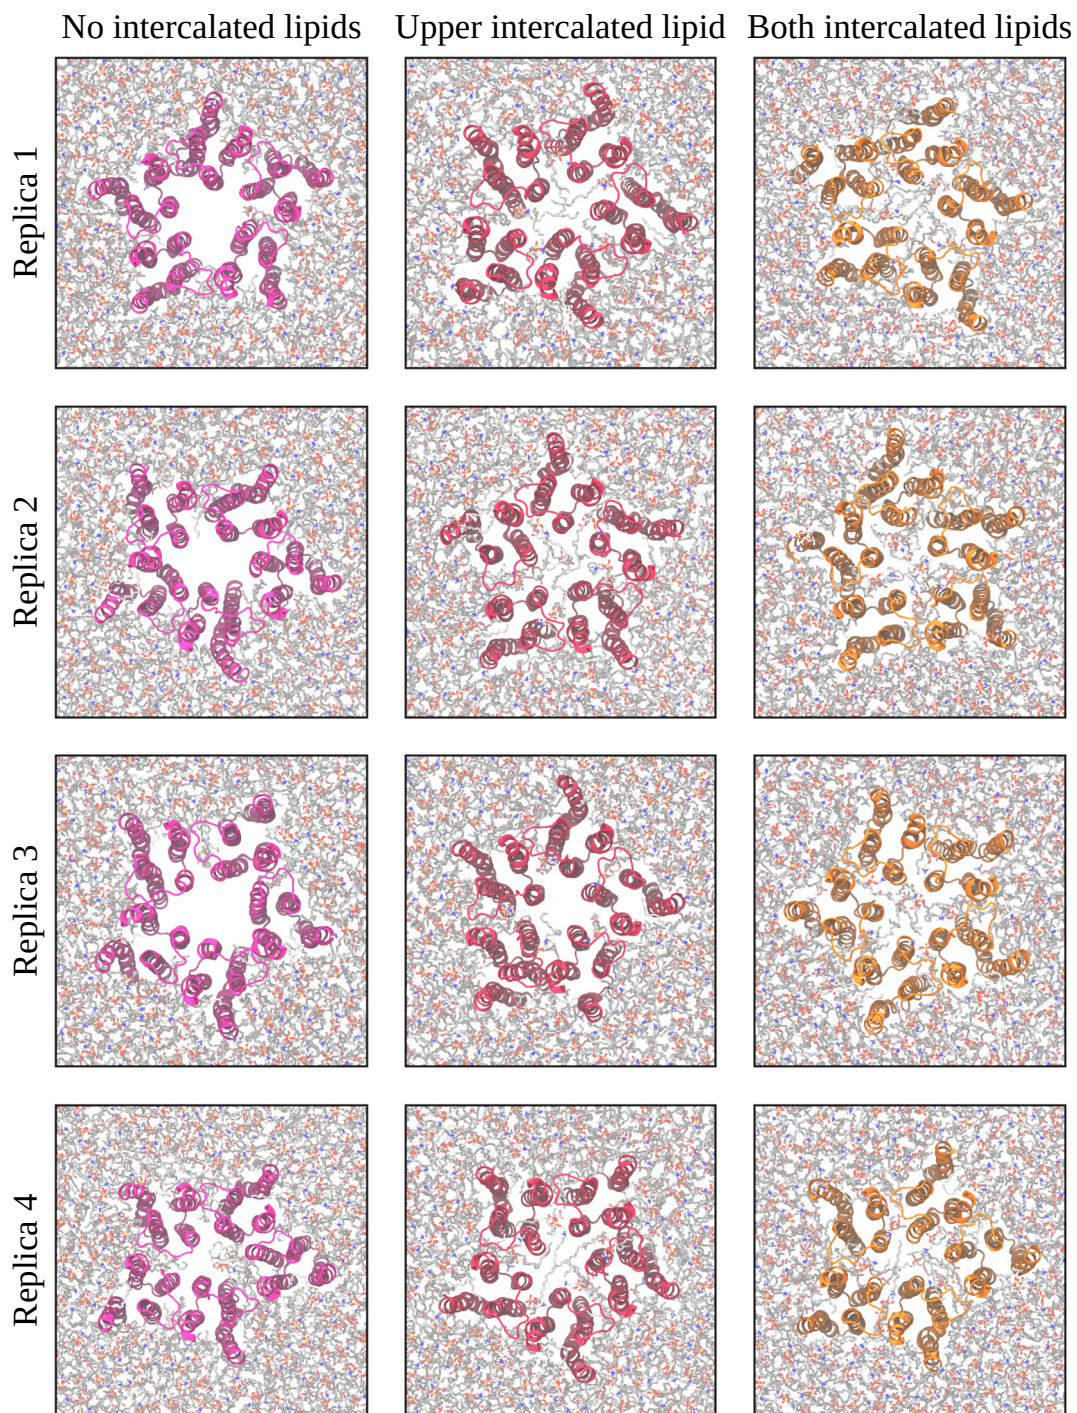

**Fig. S12. Final frame (1000 ns) of the simulations started from the X-ray structure with no calcium**, showing the transmembrane domain and lipid bilayer seen from the extracellular side. The left column show simulations started without a lipid intercalated between the subunits, the center column simulations where an upper leaflet lipid had been intercalated under the M2-M3 loop, and the right column show simulations with both an upper and a lower leaflet lipid intercalated. The pore lining M2 helices deviated during the simulations from their symmetric starting positions, and especially the systems started with intercalated lipids were prone to have lipids penetrate into the pore.

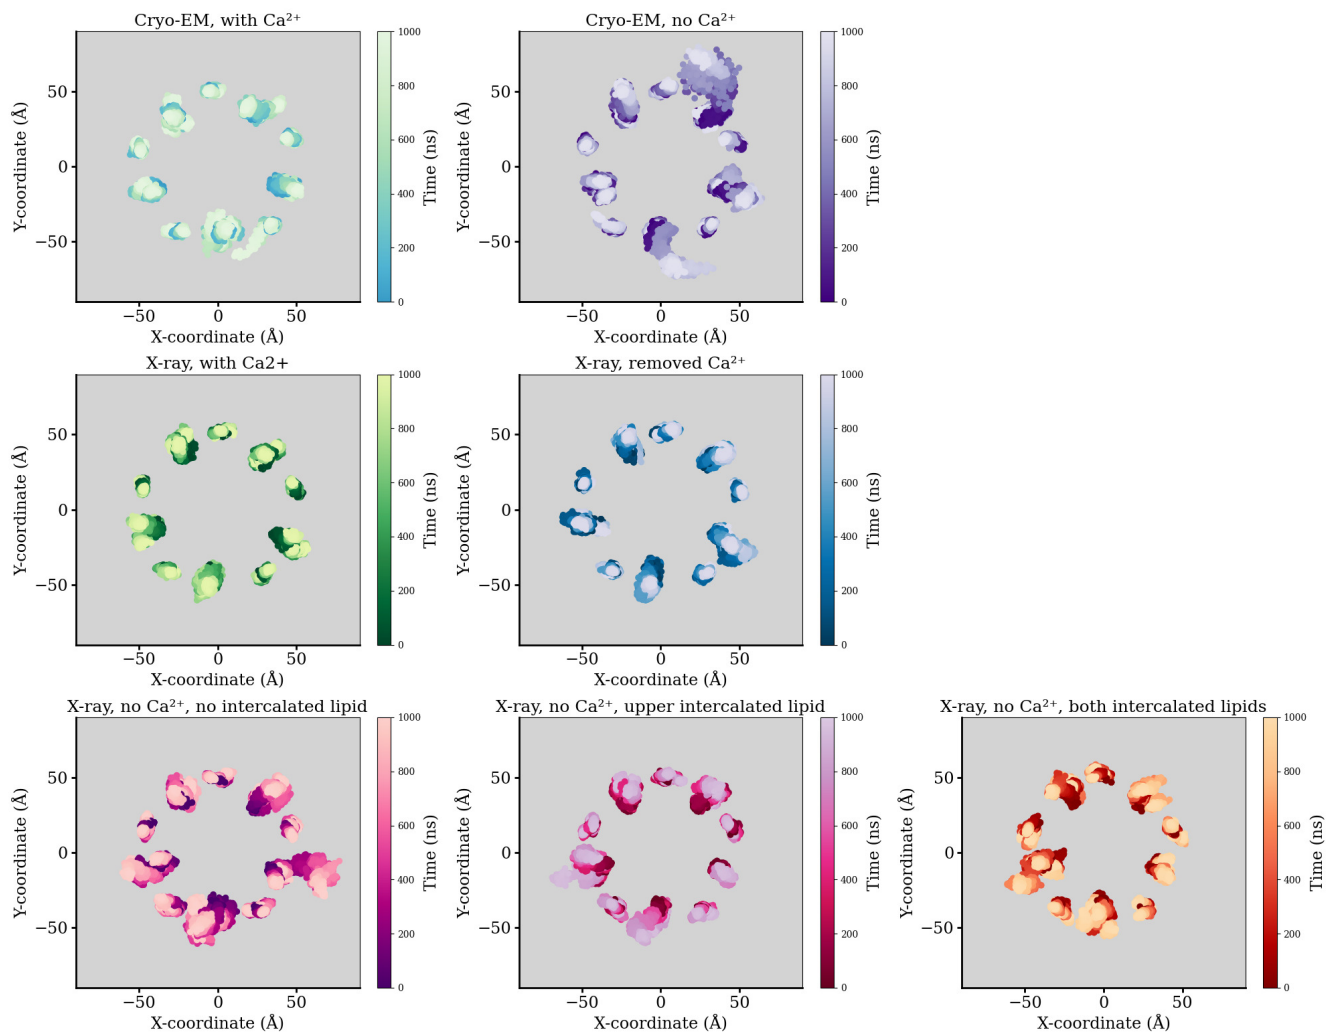

**Fig. S13. Position of the center of mass of NTD1 and NTD2 through the MD simulations, shown on the XY-plane.** The larger clusters are from NTD1, and the smaller ones are from NTD2. Values from four replicate simulations are plotted for each system.

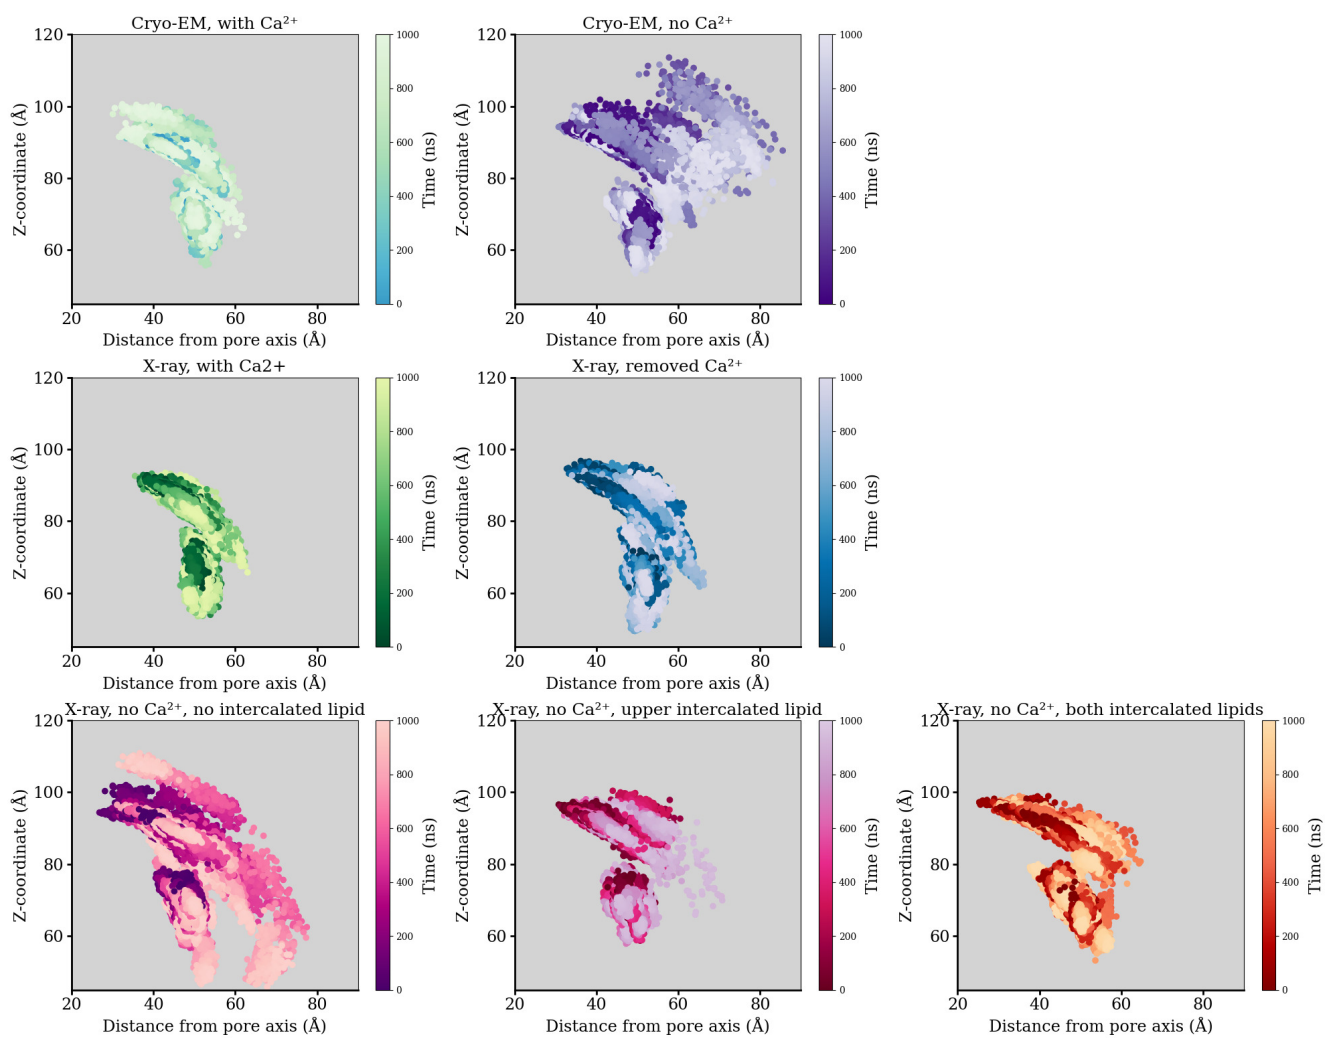

**Fig. S14.** Position of the center of mass of NTD1 and NTD2 through the MD simulations, shown as Z-coordinate versus distance from pore axis. The upper cluster is from NTD1:s, and the lower from NTD2:s. Values from four replicate simulations are plotted for each system, and NTD lobes from separate subunits are individually represented.

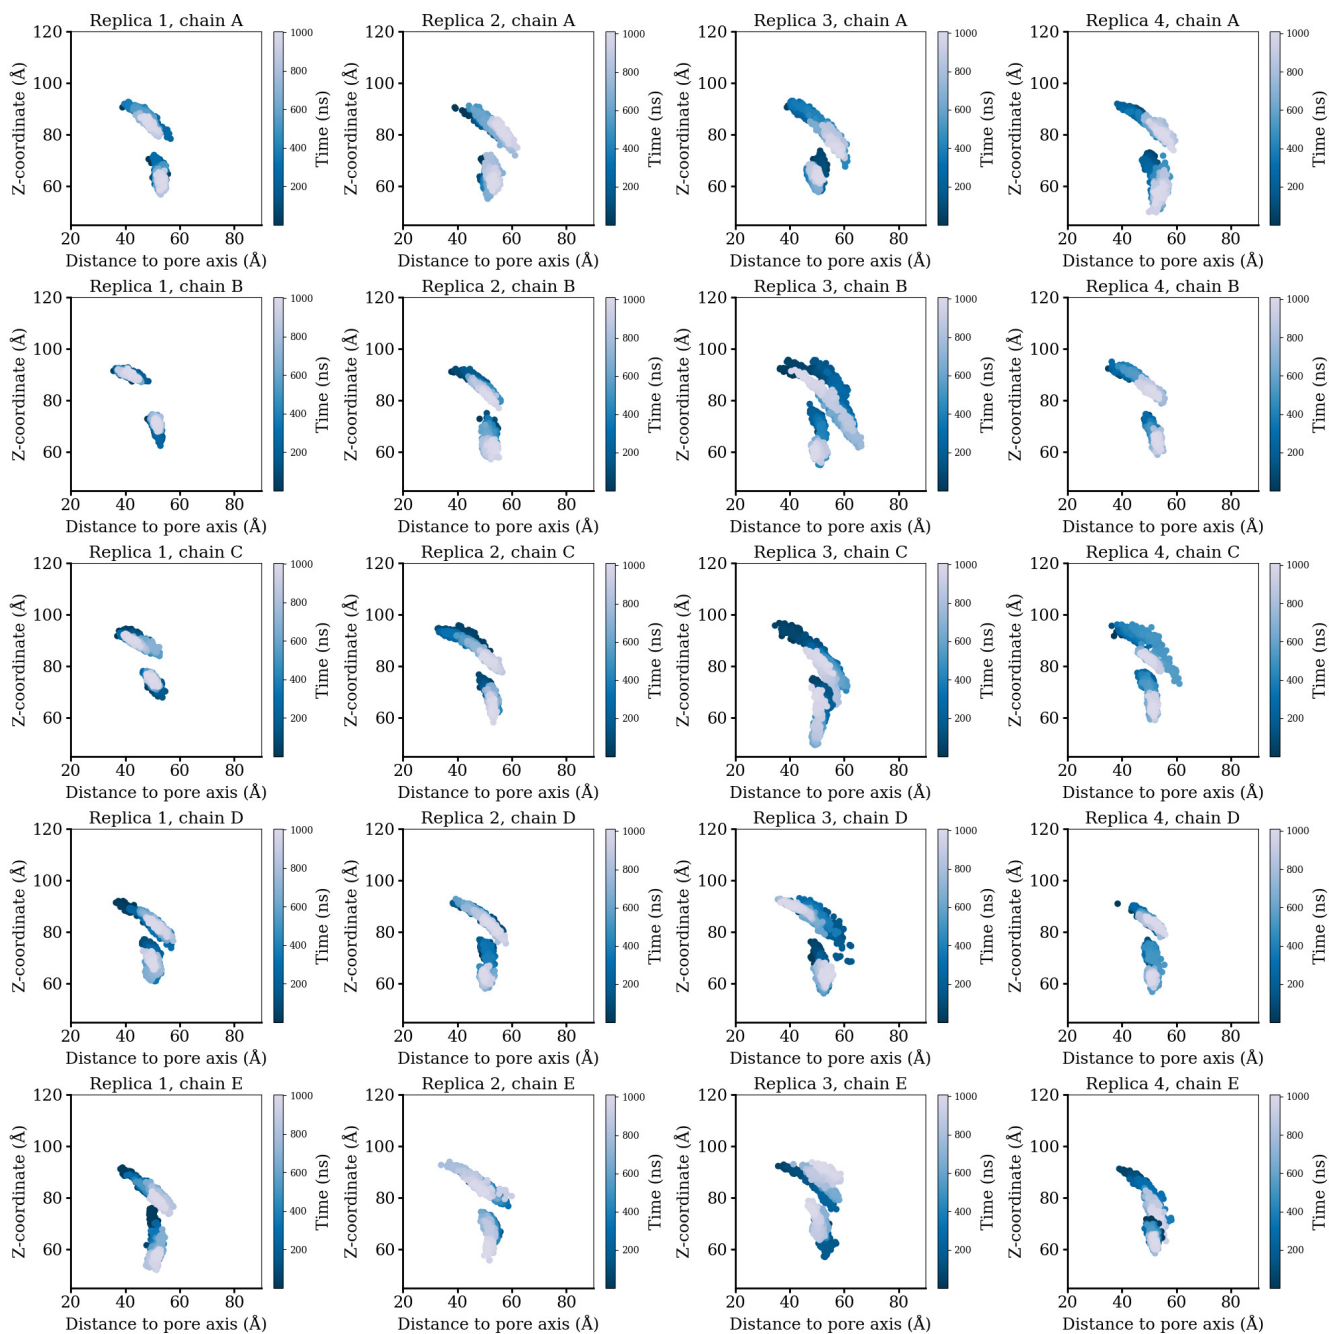

**Fig. S15.** Center of mass position of NTD1 and NTD2 shown for individual subunits across four simulation replicas of the closed-like X-ray structure with  $\text{Ca}^{2+}$  removed for the simulations. The upper cluster is from NTD1, and the lower from NTD2. The simulations contain examples of the domains remaining close to the starting positions (e.g. replica 1 chain B: column 1, row 2), of NTD1 moving out-and-down and staying there (e.g. replica 2 chain C: column 2, row 3), and of NTD1 visiting the out-and-down conformation before returning to the starting position (e.g. replica 3 chain B: column 3, row 2).



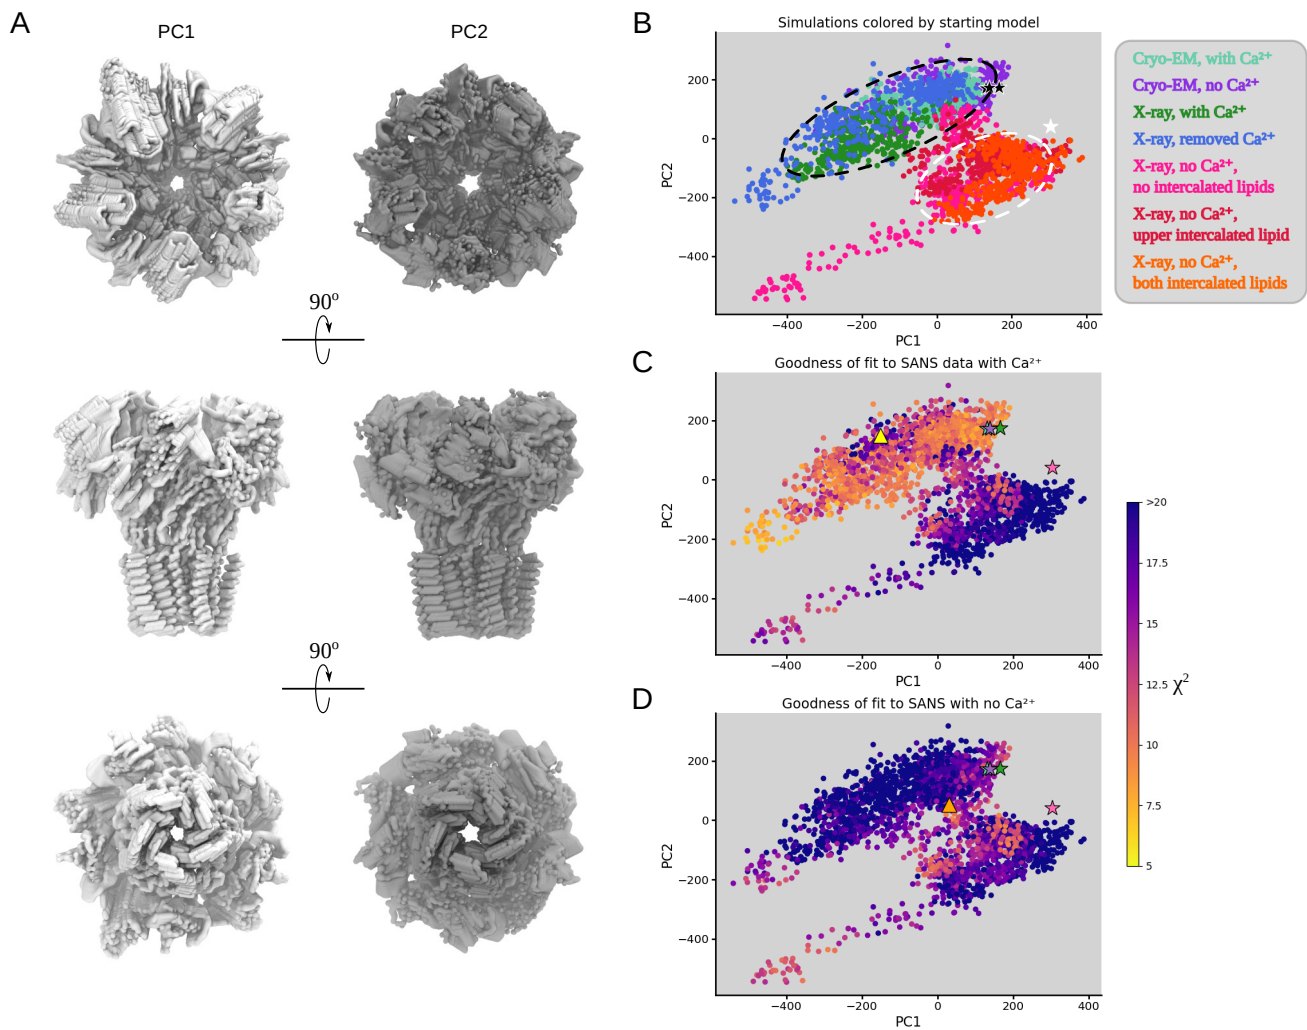

**Fig. S16.**

Principal component analysis of DeCLIC simulations (A) Representations of the motions described by the first (PC1) and second (PC2) principal components based on analysis of all DeCLIC simulations in Cartesian space, viewed from the periplasmic side (top), the membrane plane (middle), or the intracellular side (bottom). (B) MD-simulation snapshots, taken every 10 ns and colored by system, projected on their first two PCs. Closed-state simulations were initiated from structures determined by cryo-EM in the presence (teal) or absence (purple) of calcium in this work, or by crystallography with calcium retained (green) or removed (blue) from PDB ID 6V4S. Open-state simulations were initiated from the structures determined by crystallography as reported in PDB ID 6V4A (pink), or with lipids intercalated in the outer (red) or outer and inner (orange) membrane leaflets. Black and white stars represent projections of experimental structures with closed and open pores, respectively. Black and white circles indicate closed- and open-state clusters, respectively. (C) Snapshots as in A colored by goodness of fit to SANS data collected in the presence of Ca<sup>2+</sup>, according to the scalebar to the right. The snapshot with the best fit is indicated by a triangle in equivalent coloring. Stars represent projections of experimental structures, colored by system as in A. (D) Snapshots as in B colored by goodness of fit to SANS data in the absence of Ca<sup>2+</sup>.

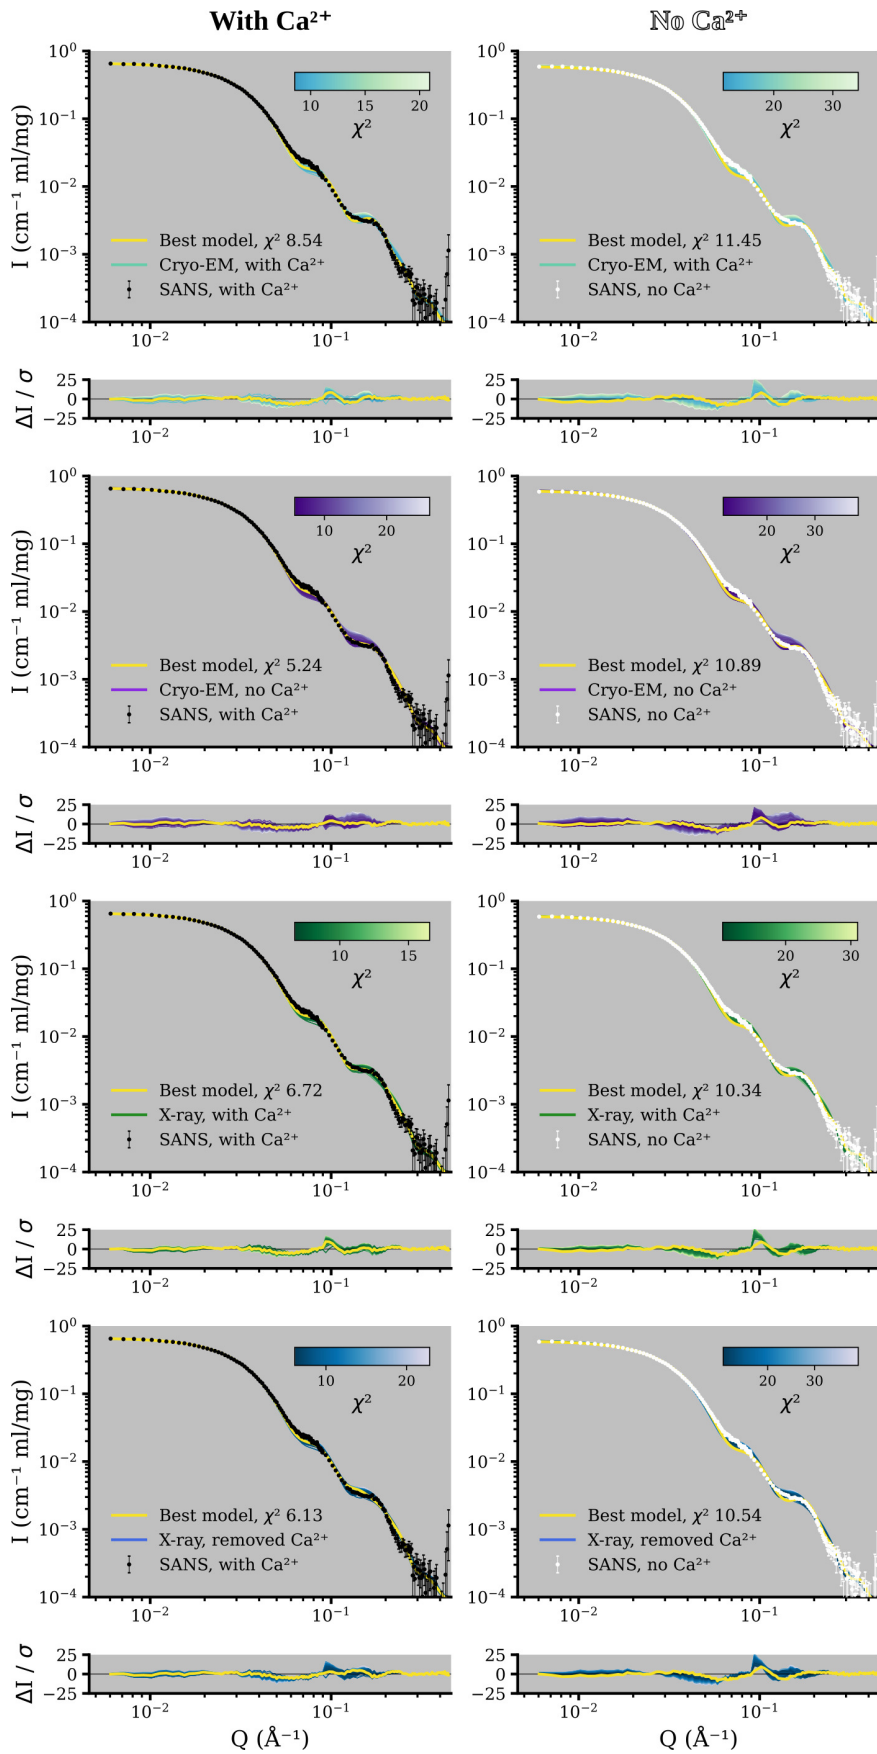

**Fig. S17.** Fits to the SANS data collected with (black) and without (white) calcium for models from simulations started from closed-like structures, i.e. the cryoEM structures and the with calcium X-ray structure. For each simulation system the theoretical curve from the snapshot yielding the best goodness of fit to the SANS data is shown in yellow.

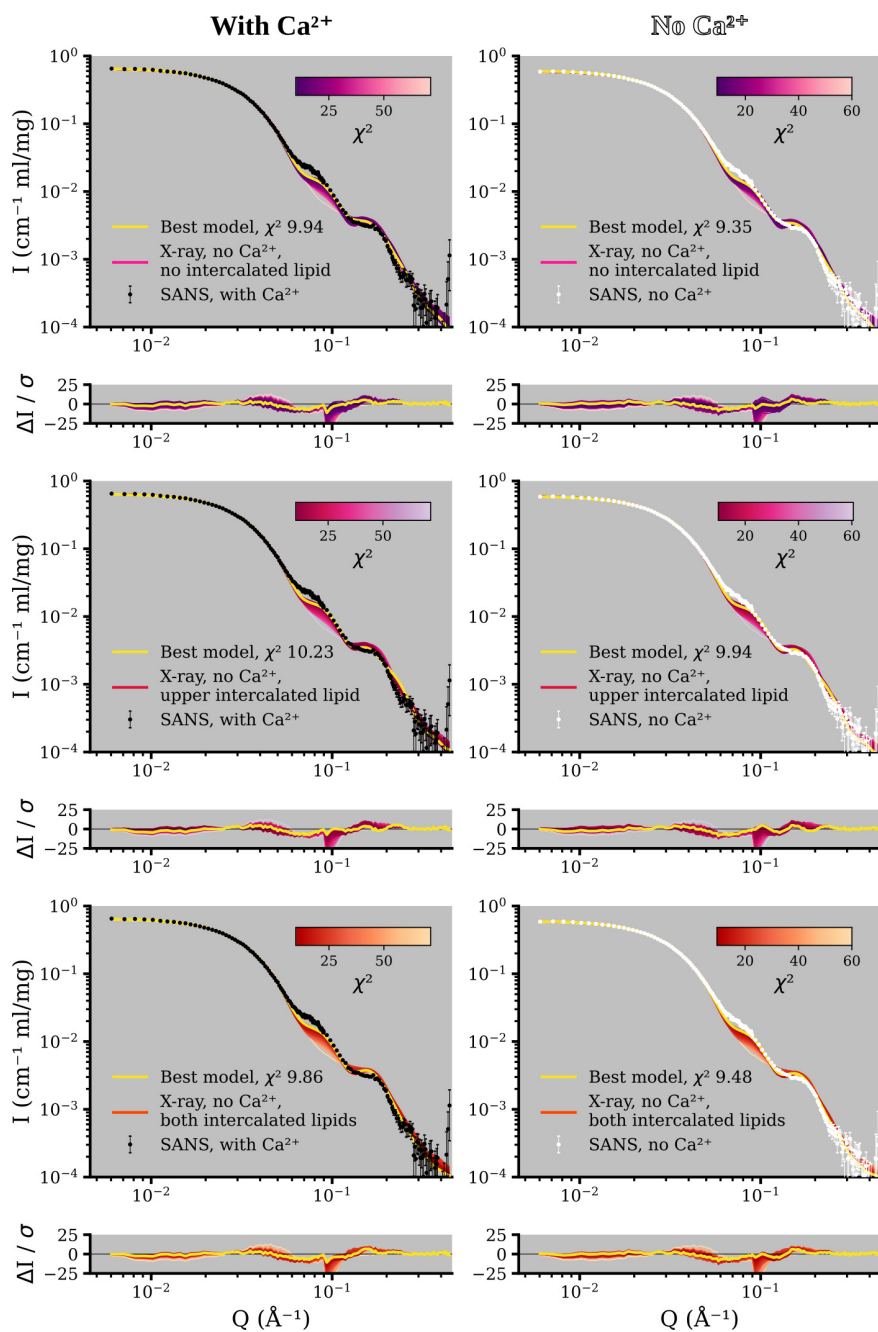

**Fig. S18.** Fits to the SANS data collected with (black) and without (white) calcium for models from simulations started from the no calcium X-ray structure. For each simulation system the theoretical curve from the snapshot yielding the best goodness of fit to the SANS data is shown in yellow.

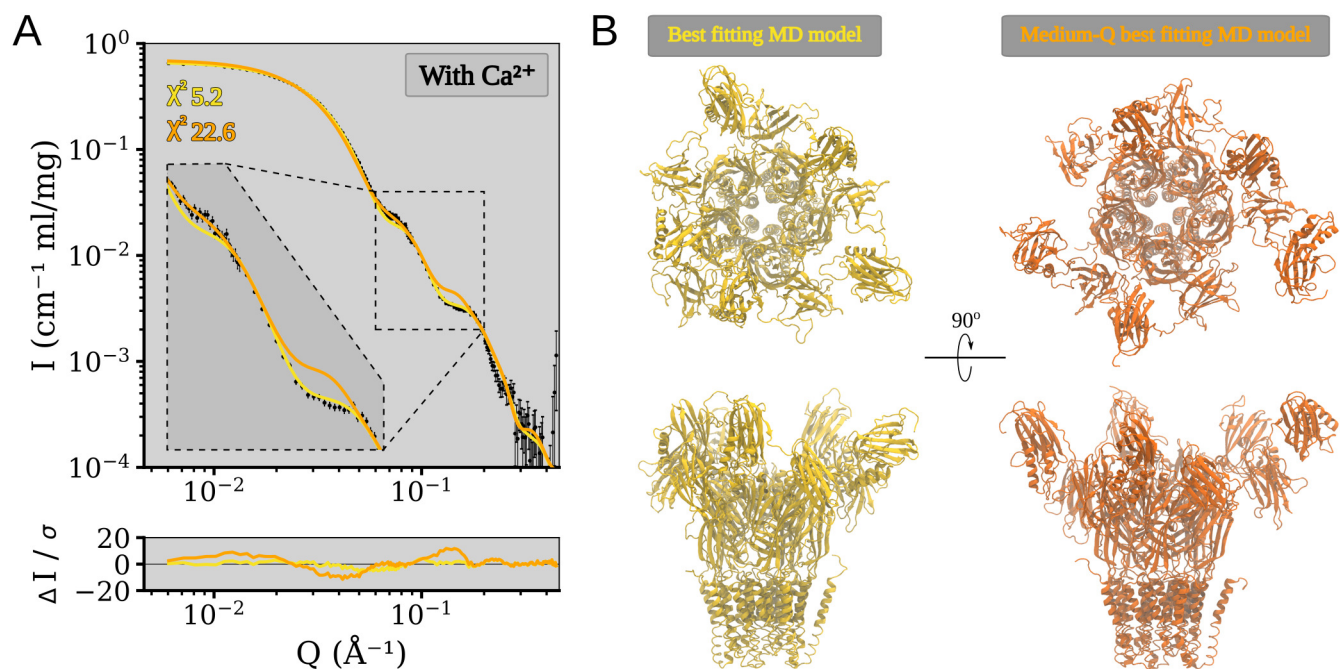

**Fig. S19. Comparison of the model with best overall fit to the with calcium SANS data and the model with the best fit to the  $Q \in [0.06, 0.09] \text{ \AA}^{-1}$  feature.** (A) Theoretical curves from MD simulation snapshots of the cryoEM no  $\text{Ca}^{2+}$  structure, fitted to the with  $\text{Ca}^{2+}$  SANS data. In yellow is the snapshot which yielded the best over all fit to the SANS data ( $\chi^2$  of 5.2), and in orange the one which had the best agreement with the medium-Q feature ( $Q \in [0.06, 0.09] \text{ \AA}^{-1}$ ,  $\chi^2$  to full scattering profile of 22.6). The model with the best agreement with the medium Q-feature has worse fit at both higher and lower Q, as seen in the zoomed insert, and in the error weighted residual. (B) Top and side view of the the snapshot yielding the fits in panel A. Both models are asymmetric, and have different degrees of extension in the NTD.

**Table S1. Summary of structural parameters calculated from the SANS data. For the Guinier analysis the minimum and maximum Q-value included is also listed.**

|                                             | With Ca <sup>2+</sup> | No Ca <sup>2+</sup> |
|---------------------------------------------|-----------------------|---------------------|
| Guinier analysis                            |                       |                     |
| $I(0)$ (cm <sup>-1</sup> )                  | 0.68                  | 0.62                |
| $R_g$ (Å)                                   | 52.0 ± 0.2            | 51.6 ± 0.2          |
| $Q_{min}$ (Å <sup>-1</sup> )                | 0.010                 | 0.010               |
| $Q_{max}$ (Å <sup>-1</sup> ), ( $QR_g$ max) | 0.035 (1.7)           | 0.035 (1.7)         |
| Coefficient of correlation $R^2$            | 0.9997                | 0.9997              |
| $M$ from $I(0)$ (kDa), (ratio to predicted) | 348 (1.02)            | 318 (0.93)          |
| $P(r)$ analysis                             |                       |                     |
| $I(0)$ (cm <sup>-1</sup> )                  | 0.679                 | 0.621               |
| $R_g$ (Å)                                   | 51.26 ± 0.03          | 50.90 ± 0.03        |
| $d_{max}$ (Å)                               | 139.77 ± 0.74         | 139.26 ± 0.56       |
| $q$ range (Å <sup>-1</sup> )                | 0.0060 - 0.4453       | 0.0060 - 0.4452     |
| $\chi^2$                                    | 0.91                  | 0.71                |
| PepsiSANS                                   |                       |                     |
| $R_g$ (Å)                                   | 50.2                  | 49.3                |

**Table S2. Summary of modeling using protein structures and models based on protein structures, covering the radius of gyration of the model and the  $\chi^2$  goodness of fit to the experimental data for the model.**

| Structures                          | 6V4A                        | 6V4S                          | Cryo-EM<br>No Ca <sup>2+</sup>   | Cryo-EM<br>With Ca <sup>2+</sup> |                                  |
|-------------------------------------|-----------------------------|-------------------------------|----------------------------------|----------------------------------|----------------------------------|
| PepsiSANS                           |                             |                               |                                  |                                  |                                  |
| Predicted $R_g$ (Å)                 | 48.2                        | 49.5                          | 49.6                             | 49.2                             |                                  |
| SANS with Ca <sup>2+</sup> $\chi^2$ | 79.23                       | 10.75                         | 11.18                            | 12.12                            |                                  |
| SANS no Ca <sup>2+</sup> $\chi^2$   | 67.70                       | 8.77                          | 11.71                            | 11.26                            |                                  |
| MD-simulation models                | 6V4A<br>No Ca <sup>2+</sup> | 6V4S<br>With Ca <sup>2+</sup> | 6V4S<br>Removed Ca <sup>2+</sup> | Cryo-EM<br>No Ca <sup>2+</sup>   | Cryo-EM<br>With Ca <sup>2+</sup> |
| Equilibration time (ns)             | 2.25                        | 2.25                          | 2.25                             | 2.25                             | 2.25                             |
| Simulation time (ns/replica)        | 1000                        | 1000                          | 1000                             | 1000                             | 1000                             |
| Replicas (nr)                       | 4                           | 4                             | 4                                | 4                                | 4                                |
| $\chi^2$ range (PepsiSANS)          |                             |                               |                                  |                                  |                                  |
| SANS with Ca <sup>2+</sup>          | 9.94 - 71.33                | 6.72 - 16.54                  | 6.13 - 22.86                     | 5.24 - 26.92                     | 8.54 - 20.93                     |
| SANS no Ca <sup>2+</sup>            | 9.35 - 60.02                | 10.34 - 31.04                 | 10.54 - 39.29                    | 10.89 - 39.02                    | 11.45 - 34.30                    |

**Table S3. Cryo-EM data collection and model refinement statistics**

| <i>Data Collection</i>                              | <b>With Ca<sup>2+</sup></b> | <b>No Ca<sup>2+</sup></b> |
|-----------------------------------------------------|-----------------------------|---------------------------|
| Microscope                                          | FEI Titan Krios             |                           |
| Magnification                                       | 165,000                     |                           |
| Voltage (kV)                                        | 300                         |                           |
| Electron exposure (e <sup>-</sup> /Å <sup>2</sup> ) | ~ 40                        |                           |
| Defocus Range (μm)                                  | -2.0 – -3.6                 | -1.4 – -3.2               |
| Pixel Size (Å)                                      | 0.82                        |                           |
| Symmetry Imposed                                    | C5                          |                           |
| Number of Images                                    | ~ 2483                      | ~ 11, 505                 |
| Particles Picked                                    | ~ 156, 000                  | ~ 485, 000                |
| Particles Refined                                   | 19,731                      | 43,650                    |
| <i>Refinement</i>                                   |                             |                           |
| Resolution (Å)                                      | 3.5                         | 3.2                       |
| FSC Threshold                                       | 0.143                       |                           |
| Map sharpening B-factor                             | -123                        | -100                      |
| Model Composition                                   |                             |                           |
| Non-hydrogen Protein atoms                          | 19,570                      | 21,620                    |
| Protein Residues                                    | 2585                        | 2795                      |
| Ligands                                             | 5                           | 0                         |
| B-factor (Å <sup>2</sup> )                          | 33.4                        | 67.5                      |
| RMSD                                                |                             |                           |
| Bond Lengths (Å)                                    | 0.004                       | 0.004                     |
| Bond Angles (°)                                     | 0.65                        | 0.58                      |
| Validation                                          |                             |                           |
| Molprobrity Score                                   | 1.97                        | 1.86                      |
| Clashscore                                          | 10.37                       | 9.02                      |
| Poor Rotamers (%)                                   | 0                           | 0                         |
| Ramachandran Plot                                   |                             |                           |
| Favored (%)                                         | 93.4                        | 94.4                      |
| Allowed (%)                                         | 6.6                         | 5.6                       |
| Outliers (%)                                        | 0                           | 0                         |

**Table S4. Table of missing residues and sidechains from the cryo-EM reconstructions**

|                           | <b>With Ca<sup>2+</sup></b>                                               | <b>No Ca<sup>2+</sup></b>                |
|---------------------------|---------------------------------------------------------------------------|------------------------------------------|
| <i>Removed Residues</i>   |                                                                           |                                          |
| NTD1                      | 28 – 68                                                                   | 28 – 37<br>57 – 67<br>78 – 83<br>79 – 84 |
|                           | 101 – 104                                                                 |                                          |
|                           | 118 – 120                                                                 |                                          |
|                           | 141 – 148                                                                 | 142 – 145                                |
|                           | 170 – 196                                                                 | 172 – 193                                |
| NTD2                      | 237 – 245                                                                 |                                          |
| C-terminus                | 641 – 642                                                                 | 640 – 642                                |
| <i>Total Removed</i>      | <b>99</b>                                                                 | <b>56</b>                                |
| <i>Removed Sidechains</i> |                                                                           |                                          |
| Leu                       | 75, 96, 100, 110, 197,<br>208, 257, 261, 271, 303                         | 110, 197, 208, 235, 261,<br>311          |
| Ile                       | 86, 107, 117, 137, 151,<br>199, 279                                       | 137, 199                                 |
| Asp                       | 87, 105, 115, 122, 215,<br>263, 278, 290, 294, 343,<br>361, 418, 435, 437 | 76, 115, 140, 213, 276,<br>361           |
| Glu                       | 97, 134, 209, 270, 297,<br>313, 425                                       | 46, 241, 270, 313                        |
| Arg                       | 116, 211, 224, 301, 312                                                   | 211                                      |
| Lys                       | 127                                                                       | 98, 127, 158, 214                        |
| Ser                       | 132                                                                       | 132                                      |
| Phe                       | 135, 259                                                                  | 259                                      |
| Asn                       | 153, 310                                                                  | 104                                      |
| Gln                       | 277, 316                                                                  | 316                                      |
| Val                       | 319, 323                                                                  | 319                                      |
| Thr                       |                                                                           | 71                                       |



**Table S5. Sample details.**

|                                                                                                                                                  |                                   |
|--------------------------------------------------------------------------------------------------------------------------------------------------|-----------------------------------|
| Organism of origin                                                                                                                               | <i>Desulfotrustis</i> sp. PB-SRB1 |
| Expression system                                                                                                                                | <i>Echerichia coli</i>            |
| UniProt ID                                                                                                                                       | V4JF97                            |
| Extinction coefficient [ $A_{280}$ 0.1%(w/v)]                                                                                                    | 1.107                             |
| Volume from structure ( $\text{\AA}^3$ )                                                                                                         | 495062                            |
| Particle contrast from sequence and solvent constituents, $\Delta\bar{\rho}$ ( $ \rho_{protein} - \rho_{solvent} $ ; $10^{10} \text{ cm}^{-2}$ ) | 3.94<br>( 2.44 – 6.38 )           |
| M from chemical composition (kDa)                                                                                                                | 341.7                             |

**Table S6. Summary the SANS collection parameters, including wavelength, pathlength, detector distances, Q-range, absolute scaling method, normalization, sample concentration and volume, and buffer composition.**

|                                                       |                                                                                       |
|-------------------------------------------------------|---------------------------------------------------------------------------------------|
| Instrument                                            | ILL D22                                                                               |
| Wavelength (Å)                                        | 6                                                                                     |
| Pathlength (cm)                                       | 0.1                                                                                   |
| Detector distances (m)                                | 2.8m/2.8m & 8m/8m                                                                     |
| Q measurement range (Å <sup>-1</sup> )                | 0.006 - 0.452                                                                         |
| Absolute scaling method                               | Incident beam flux                                                                    |
| Normalization                                         | Divided by concentration                                                              |
| Exposure time (aggregate time)                        |                                                                                       |
| With Ca <sup>2+</sup>                                 | 111 x 30s ( 55.5 min)                                                                 |
| No Ca <sup>2+</sup>                                   | 127 x 30s (63.5 min)                                                                  |
| Column                                                | Superdex 200 Increase 10/300                                                          |
| Sample temperature (°C)                               | 10                                                                                    |
| Loading concentration                                 | 6 mg/ml                                                                               |
| Injection volume                                      | 240 µl                                                                                |
| Flow rate (ml/min)                                    | 0.2, 0.01, 0                                                                          |
| Average concentration (mg/ml) in combined data frames |                                                                                       |
| With Ca <sup>2+</sup>                                 | 1.09                                                                                  |
| No Ca <sup>2+</sup>                                   | 1.14                                                                                  |
| Solvent                                               |                                                                                       |
| With Ca <sup>2+</sup>                                 | D <sub>2</sub> O, 150 mM NaCl, 20 mM Tris-HCl, 10 mM CaCl <sub>2</sub> , 0.5 mM d-DDM |
| No Ca <sup>2+</sup>                                   | D <sub>2</sub> O, 150 mM NaCl, 20 mM Tris-HCl, 10 mM EDTA, 0.5 mM d-DDM               |

**Table S7. Summary of software and equations employed for SANS data reduction, analysis, and interpretation.**

|                                                |                                                                                                                                                          |
|------------------------------------------------|----------------------------------------------------------------------------------------------------------------------------------------------------------|
| Momentum transfer                              | $Q=(4\pi/\lambda)\sin(\theta)$                                                                                                                           |
| SANS data reduction                            | GRASP v. 9.04 (2)                                                                                                                                        |
| Extinction coefficient estimate                | ProtParam (3)                                                                                                                                            |
| Guinier equation                               | $\ln(I(Q)) = \ln(I(0)) - \frac{R_g^2}{3} Q^2$                                                                                                            |
| Calculation of $M_w$                           | $M_w = \frac{N_A \cdot I(0)}{c(\Delta\rho \cdot \bar{v})^2}$                                                                                             |
| Calculation of $\rho$                          | $\rho = (\sum_{i=1}^N b_i)/V$                                                                                                                            |
| Calculation of $\bar{v}$                       | $\bar{v} = V/M_{aa}$                                                                                                                                     |
| Protein volume estimation                      | $^3V$ : Voss Volume Voxelator (4)                                                                                                                        |
| Relationship between Q and distance            | $d = 2\pi/Q$                                                                                                                                             |
| $P(r)$ analysis                                | BayesApp (5) via web server<br>( <a href="https://somo.chem.utk.edu/bayesapp/">https://somo.chem.utk.edu/bayesapp/</a> )                                 |
| $P(r)$ from structure                          | CaPP (6) ( <a href="https://github.com/Niels-Bohr-Institute-XNS-StructBiophys/CaPP">https://github.com/Niels-Bohr-Institute-XNS-StructBiophys/CaPP</a> ) |
| Atomic structure modelling                     | PepsiSANS v. 3.0 (7)                                                                                                                                     |
| Missing sequence modelling                     | MODELLER v. 9.22 (8)                                                                                                                                     |
| Simulation system set-up                       | CHARMM-GUI membrane builder (9, 10)                                                                                                                      |
| Molecular dynamics simulations                 | GROMACS v. 2020.3 (11)                                                                                                                                   |
| Theoretical $R_g$                              | PepsiSANS v. 3.0 (7)                                                                                                                                     |
| Hydrogen-deuterium exchange                    | PSX (12)                                                                                                                                                 |
| Three-dimensional graphic model representation | VMD (13), UCSF Chimera (14)                                                                                                                              |
| Plots                                          | MATPLOTLIB (15)                                                                                                                                          |
| Pore profiles                                  | CHAP (16)                                                                                                                                                |

15 **Movie S1.** In the absence of calcium, sodium (cyan and blue) visit the calcium binding site, and some sodium  
16 ions pass between the central ECD vestibule and the outside of the protein through this site (one instance  
17 highlighted in blue). Glutamates in one calcium binding site are shown as sticks, and for clarity only sodium  
18 ions in the vicinity of this site are shown. The movie covers the final 300 ns of one replica, and was generated  
19 with trajectory smoothing on.

## 20 References

- 21 1. H Hu, RJ Howard, U Bastolla, E Lindahl, M Delarue, Structural basis for allosteric transitions of a multidomain pentameric  
22 ligand-gated ion channel. *Proc. Natl. Acad. Sci.* **117**, 13437–13446 (2020).
- 23 2. C Dewhurst, *GRASP v. 9.04*. (Institute Laue-Langevin), (2020-08-24).
- 24 3. E Gasteiger, et al., Protein identification and analysis tools on the expasy server in *The proteomics protocols handbook*.  
25 (Springer), pp. 571–607 (2005).
- 26 4. NR Voss, M Gerstein, 3v: cavity, channel and cleft volume calculator and extractor. *Nucleic acids research* **38**, W555–W562  
27 (2010).
- 28 5. S Hansen, Bayesapp: a web site for indirect transformation of small-angle scattering data. *J. Appl. Crystallogr.* **45**,  
29 566–567 (2012).
- 30 6. AH Larsen, Capp: Calculating pair distance distribution functions for proteins (2020).
- 31 7. S Grudinin, *Pepsi-SANS v. 3.0*. (Nano-D team, Inria/CNRS Grenoble), (2020).
- 32 8. B Webb, A Sali, Comparative protein structure modeling using modeller. *Curr. Protoc. Bioinforma.* **54**, 5.6.1–5.6.37  
33 (2016).
- 34 9. S Jo, T Kim, W Im, Automated builder and database of protein/membrane complexes for molecular dynamics simulations.  
35 *PLoS one* **2**, e880 (2007).
- 36 10. S Jo, T Kim, VG Iyer, W Im, Charmm-gui: a web-based graphical user interface for charmm. *J. computational chemistry*  
37 **29**, 1859–1865 (2008).
- 38 11. MJ Abraham, et al., Gromacs: High performance molecular simulations through multi-level parallelism from laptops to  
39 supercomputers. *SoftwareX* **1**, 19–25 (2015).
- 40 12. MC Pedersen, et al., Pxs, protein–solvent exchange: software for calculation of deuterium-exchange effects in small-angle  
41 neutron scattering measurements from protein coordinates. *J. Appl. Crystallogr.* **52**, 1427–1436 (2019).
- 42 13. W Humphrey, A Dalke, K Schulten, VMD – Visual Molecular Dynamics. *J. Mol. Graph.* **14**, 33–38 (1996).
- 43 14. EF Pettersen, et al., Ucsf chimera—a visualization system for exploratory research and analysis. *J. computational chemistry*  
44 **25**, 1605–1612 (2004).
- 45 15. JD Hunter, Matplotlib: A 2d graphics environment. *Comput. Sci. & Eng.* **9**, 90–95 (2007).
- 46 16. G Klesse, S Rao, MS Sansom, SJ Tucker, Chap: a versatile tool for the structural and functional annotation of ion channel  
47 pores. *J. molecular biology* **431**, 3353–3365 (2019).
